# Supplementary material for: Li2S–Embedded copper metal–organic framework cathode with superior electrochemical performance for Li–S batteries
Source: Royal Society of Chemistry journal article supplement (doi:10.1039/c8nj02370k), 2018-01-01
Supplement: c8nj02370k1.pdf [file c8nj02370k1.pdf]

New Journal of Chemistry    Supplementary Information

**Li<sub>2</sub>S-embedded Copper Metal-Organic Framework Cathode with Superior Electrochemical Performance for Li-S Batteries**

*Yan Feng,<sup>\*,1</sup> Yuliang Zhang,<sup>1</sup> Guixiang Du,<sup>1</sup> Jingbo Zhang,<sup>1</sup> Miao Liu,<sup>2,3</sup> and Xiaohui Qu,<sup>\*,2,4</sup>*

<sup>1</sup> Key Laboratory of Inorganic-Organic Hybrid Functional Materials Chemistry, Ministry of Education, Tianjin Key Laboratory of Structure and Performance for Functional Molecules, College of Chemistry, Tianjin Normal University, Tianjin 300387, P. R. China

<sup>2</sup> Energy Storage and Distributed Resources Division, Lawrence Berkeley National Laboratory, Berkeley, California 94720, United States

<sup>3</sup> Institute of Physics, Chinese Academy of Sciences, Beijing 100190, P. R. China

<sup>4</sup> College of Engineering Research, University of California, Berkeley, California 94720, United States

\*Corresponding Authors: [hxyfy@tjnu.edu.cn](mailto:hxyfy@tjnu.edu.cn) (Y.F.); [xqu@lbl.gov](mailto:xqu@lbl.gov) (X. Q.)

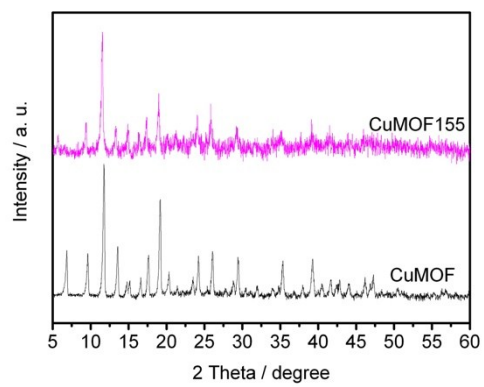

**Figure S1.** XRD patterns of pristine CuMOF before and after 155 °C heating.

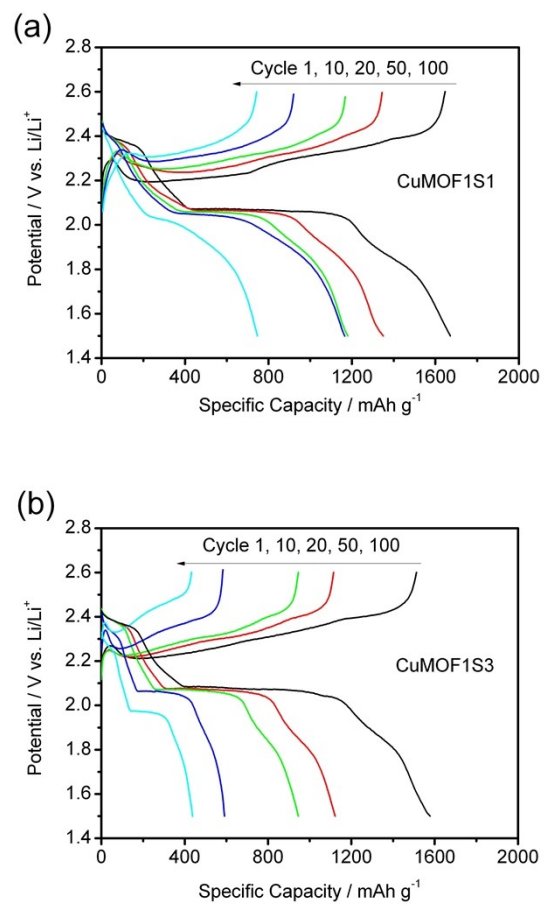

**Figure S2.** The specific capacity-potential curves of the CuMOF1S1 (a) and CuMOF1S3 (b) at 1<sup>st</sup>, 10<sup>th</sup>, 20<sup>th</sup>, 50<sup>th</sup> and 100<sup>th</sup> cycle.

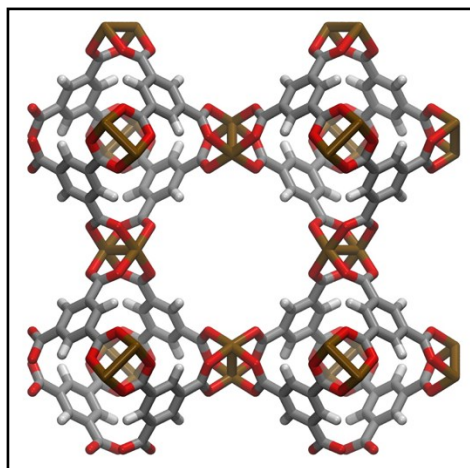

**Figure S3.** Optimized structure of the pristine CuMOF by linear scaling DFT.

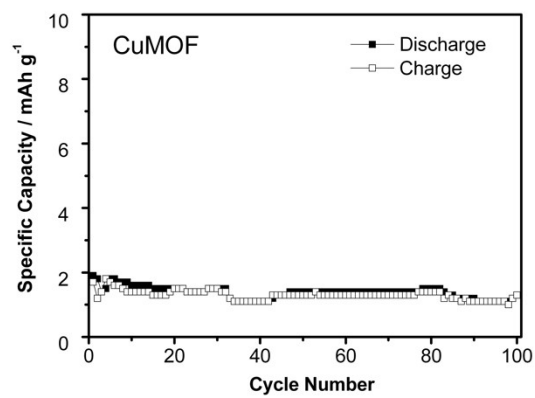

**Figure S4.** Cycle performance of pristine CuMOF (without S) cathode at a charge/discharge current density of 200 mAh g<sup>-1</sup>.
